# Supplementary material
Source: publisher figshare collection journal article supplement (https://frontiersin.figshare.com/ndownloader/files/13075706)
Supplement: Supplementary file [file 13075706]

## Table S2

**Table S2. Toxicity of PEP005 and birinapant in combination**

| Agent (concentration)                 | % replication |
|---------------------------------------|---------------|
| PEP005 (10 nM) + birinapant (10 nM)   | 84.8 %        |
| PEP005 (100 nM) + birinapant (100 nM) | 80.8 %        |
| PEP005 (1 µM) + birinapant (1 µM)     | 65.5 %        |
| PEP005 (10 µM) + birinapant (10 µM)   | 50.0 %        |

PBMCs ( $2 \times 10^6$  cells/ml) were treated with birinapant (10 nM - 10 µM) and/or PEP005 (10 nM - 100 µM) and cultured for 3 days. Cell viability was measured by WST-8 assay.
